# Supplementary material for: Boosting the Zn-ion transfer kinetics to stabilize the Zn metal interface for high-performance rechargeable Zn-ion batteries
Source: Royal Society of Chemistry journal article supplement (doi:10.1039/d1ta03967a), 2021-01-01
Supplement: d1ta03967a1.pdf [file d1ta03967a1.pdf]

## Supporting Information

### Boosting the Zn-ion transfer kinetics to stabilize the Zn metal interface for high-performance rechargeable Zn-ion batteries

Lin Hong, Xiuming Wu, Chao Ma, Wei Huang,\* Yongfeng Zhou, Kai-Xue Wang,\* Jie-Sheng Chen

School of Chemistry and Chemical Engineering, State Key Laboratory of Metal Matrix Composites, Shanghai Jiao Tong University, 800 Dongchuan Road, Shanghai 200240, P. R. China.

E-mail: [hw66@sjtu.edu.cn](mailto:hw66@sjtu.edu.cn) (WH); [k.wang@sjtu.edu.cn](mailto:k.wang@sjtu.edu.cn) (KXW)

#### Experimental Section

**Materials:** Montmorillonite (> 99.9%), ZnCl<sub>2</sub> (> 99.0%), MnSO<sub>4</sub> (> 99.0%), KMnO<sub>4</sub> (> 99.0%), ZnSO<sub>4</sub> (> 99.0%) were purchased from Sigma-Aldrich Chemical Co. All other reagents were analytical grade and used directly without further purification. Deionized water was used to prepare all aqueous electrolytes.

**Preparation of Zn-Mont:** In a typical procedure, 2.0 g of montmorillonite was acidactivated with 150 mL of HCl (0.01 M) at 60 °C for 3 h under magnetic stirring. The acid-activated montmorillonite was centrifuged and washed thoroughly with distilled water several times. Then, the obtained montmorillonite was dried at 70 °C for 24 h under vacuum, and mechanically ground into ultrafine powder. Subsequently, the acid-activated montmorillonite was added into 150 mL of 1.0 M ZnCl<sub>2</sub> solution, followed by stirring at 100 °C for 30 min under reflux and then 70 °C for 8 h<sup>[1]</sup>. The Zn-ion loaded montmorillonite was collected by centrifugation (7000 rpm, 10 min) of the reaction mixture, washing repeatedly with distilled water, vacuum drying (70 °C, 24 h) and mechanical grinding. The

Zn-ion intercalated montmorillonite was denoted as Zn-Mont and the untreated montmorillonite as Ca-Mont.

**Preparation of Zn@Zn-Mont:** Zn-Mont and PVDF were mixed with a weight ratio of 8:2 and formed slurry by adding NMP dispersant. The slurry was coated onto Zn foil (30  $\mu\text{m}$ ) and dried at 70  $^{\circ}\text{C}$  for 24 h under vacuum. For comparison, Zn@Ca-Mont was also prepared by replacing Zn-Mont with Ca-Mont.

**Preparation of MnO<sub>2</sub>:** MnO<sub>2</sub> powders were prepared by a hydrothermal method according to the previous work<sup>[2]</sup>. Briefly, 2.0 mL of H<sub>2</sub>SO<sub>4</sub> solution (0.5 M) was added into 90 mL of MnSO<sub>4</sub> solution (0.003 M) under magnetically stirring until a transport solution was obtained. Then, 20 mL of KMnO<sub>4</sub> solution (0.1 M) was added into the above solution drop by drop. After further stirring for 2 h, the mixture was transferred into a Teflonlined autoclave and maintained at 120  $^{\circ}\text{C}$  for 12 h. Finally, the resulting product was collected by centrifugation, washed thoroughly with deionized water, and dried at 70  $^{\circ}\text{C}$  for 24 h under vacuum.

**Materials characterizations:** Powder X-ray diffraction (XRD) patterns were collected by a Rigaku Mini Flex 600 diffractometer using Cu K $\alpha$ -radiation ( $\lambda = 1.5418$ ). The morphology of the samples was collected on a field emission scanning electron microscope (SEM, Nova NanoSEM 450) equipped with an energy dispersive X-ray spectrometer (EDS). XPS measurements was conducted on AXIS Ultra DLD X-ray photoelectron spectrometer. The spinning disk confocal microscopy (SDCM) images have been collected on Zeiss Smartproof 5 microscope. The specific surface areas of samples were analyzed by Brunauere-Emmette-Teller (BET) method (micromeritics ASAP 2020). The in situ optical visualization observations of Zn plating/stripping behavior were performed on an optical microscope (LEICA DM 4000).

**Electrochemical measurements:** CR2032-type coin Zn-Zn symmetric cells were assembled with two identical electrodes of bare Zn, Zn@Ca-Mont or Zn@Zn-Mont (diameter: 12 mm, thickness: 30  $\mu\text{m}$ ), 2.0 M  $\text{ZnSO}_4$  electrolyte and glass fiber separators. To analyze the coulombic efficiency of Zn deposition/dissolution, Cu foil, Cu@Ca-Mont, or Cu@Zn-Mont was used as working electrode, and Zn foil was employed as counter electrode. The cathode electrodes were composed of  $\text{MnO}_2$ , conductive carbon black and polyvinylidene fluoride (PVDF) at a weight ratio of 8:1:1, using NMP as solvent. The resulting slurry was coated on disc-shaped stainless steel meshes ( $\Phi = 12$  mm) and then dried in a vacuum oven at 80  $^\circ\text{C}$  for 12 h. The cathode and anode electrodes were separated by glass fiber separators ( $\Phi = 19$  mm). 2.0 M  $\text{ZnSO}_4 + 0.1$  M  $\text{MnSO}_4$  aqueous solution was used as electrolyte for all coin cells in this work, which were assembled in the air atmosphere. All the galvanostatic charge/discharge tests were conducted on a Neware battery testing system. CV, EIS, and corrosion tests were tested using an electrochemical workstation (CHI760E, China).

**Computational Method:** Density functional theory (DFT) calculations were carried out using projector-augmented wave (PAW) method as implemented in Vienna ab initio simulation package (VASP) [3-5]. A generalized gradient approximation (GGA) of Perdew-Burke-Ernzerhof (PBE) functional was employed to describe the exchange-correlation interaction [6]. The DFT-D3 method was also adopted to evaluate the van der Waals interactions [7]. To ensure the accuracy of the calculated results, the energy cutoff was set to 520 eV and the Brillouin zone was sampled by  $5 \times 3 \times 5$  Monkhorst-Pack k-points mesh in all calculations. The structures were relaxed until the forces and total energy on all atoms were converged to less than 0.05 eV  $\text{\AA}^{-1}$  and  $1 \times 10^{-5}$  eV. Diffusion barriers for Zn hopping between adjacent interstitial sites in the interlayer are calculated using the climbing-image nudged elastic band (CI-NEB) method [8].

**Table S1 Performance comparison of symmetric cell and full cell for this work with recently reported cells.**

| Electrode                        | Symmetric cell performance |                        |      | Full cell performance |                       |          | Reference |           |
|----------------------------------|----------------------------|------------------------|------|-----------------------|-----------------------|----------|-----------|-----------|
|                                  | Current                    | Capacity               | Life | Cathode               | Current               | Capacity |           | Cycle     |
|                                  | (mA/cm <sup>2</sup> )      | (mAh/cm <sup>2</sup> ) | (h)  |                       |                       | (mAh/g)  |           |           |
| Zn@Zn-Mont                       | 2                          | 1                      | 700  | MnO <sub>2</sub>      | 2 C                   | 197.5    | 1000      | This work |
| ZF@F-TiO <sub>2</sub>            | 1                          | 1                      | 460  | MnO <sub>2</sub>      | 1 A/g                 | 80       | 300       | 9         |
| CaCO <sub>3</sub> coated Zn      | 2                          | 0.1                    | 80   | MnO <sub>2</sub>      | 1 A/g                 | 175      | 1000      | 10        |
| Zn@ZIF-8                         | 1                          | 1                      | 50   | -                     | -                     | -        | -         | 11        |
| Zn/CNT                           | 2                          | 2                      | 200  | MnO <sub>2</sub>      | 20 mA/cm <sup>2</sup> | 165      | 1000      | 12        |
| Zn@CFs                           | 1                          | 1                      | 160  | MnO <sub>2</sub>      | 1 C                   | 207      | 140       | 13        |
| NTP@Zn                           | 1                          | 1                      | 250  | MnO <sub>2</sub>      | 5 C                   | 128      | 600       | 14        |
| MZn-60                           | 0.2                        | 0.2                    | 800  | MnO <sub>2</sub>      | 1 A/g                 | 205      | 500       | 15        |
| CM@CuO@Zn                        | 1                          | 1                      | 340  | MnO <sub>2</sub>      | 5 A/g                 | 140      | 900       | 16        |
| Zn/C <sub>3</sub> N <sub>4</sub> | 2                          | 2                      | 500  | -                     | -                     | -        | -         | 17        |
| r-Zn                             | 1                          | 0.2                    | 400  | -                     | -                     | -        | -         | 18        |

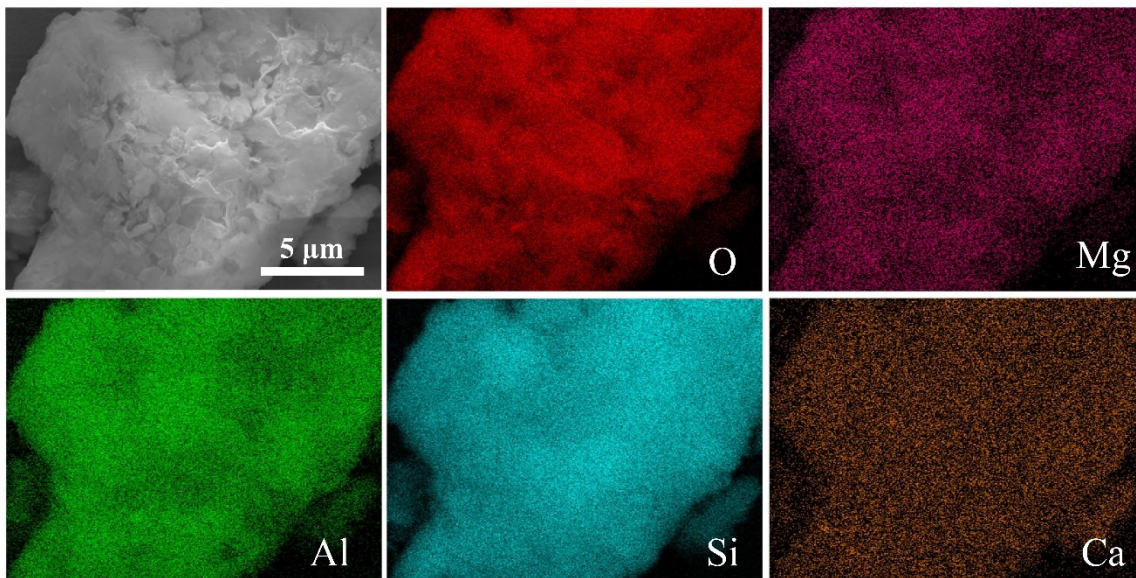

**Figure S1** EDS elemental mapping images of Ca-Mont powder.

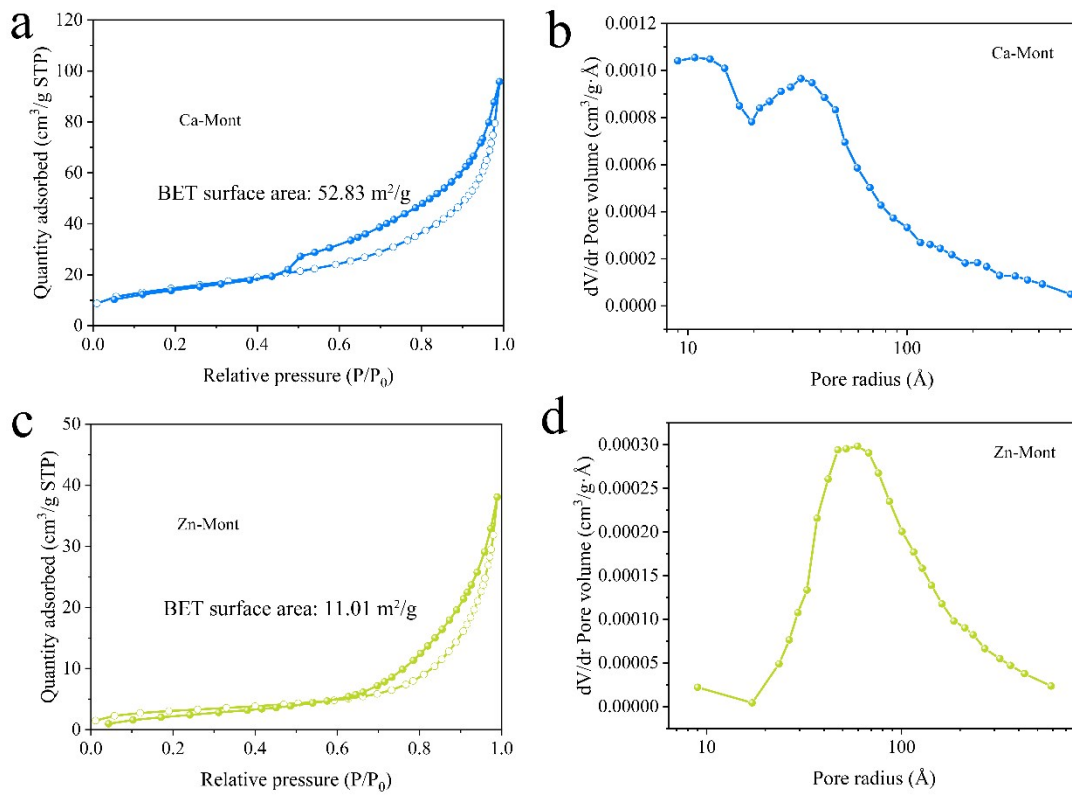

**Figure S2** (a, c) Nitrogen adsorption/desorption isotherms and (b, d) pore size distributions of (a, b) Ca-Mont and (c, d) Zn-Mont.

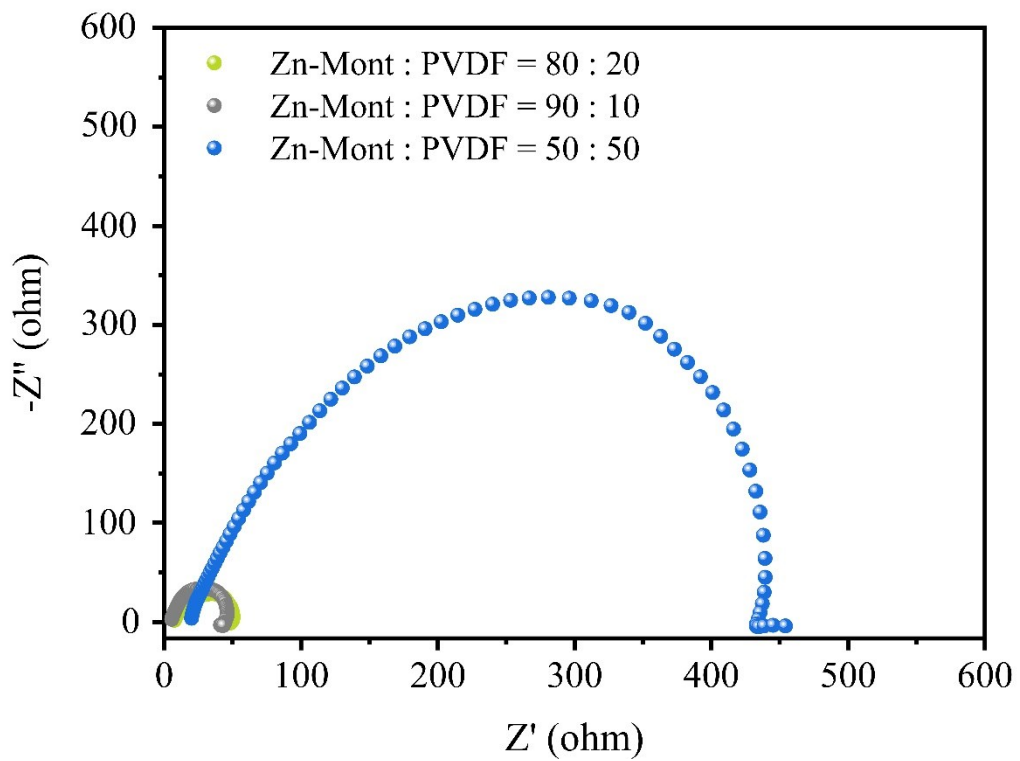

**Figure S3** Nyquist plots of symmetric cells using Zn@Zn-Mont electrodes with different Zn-Mont/PVDF ratio (90:10, 80:20, and 50:50).

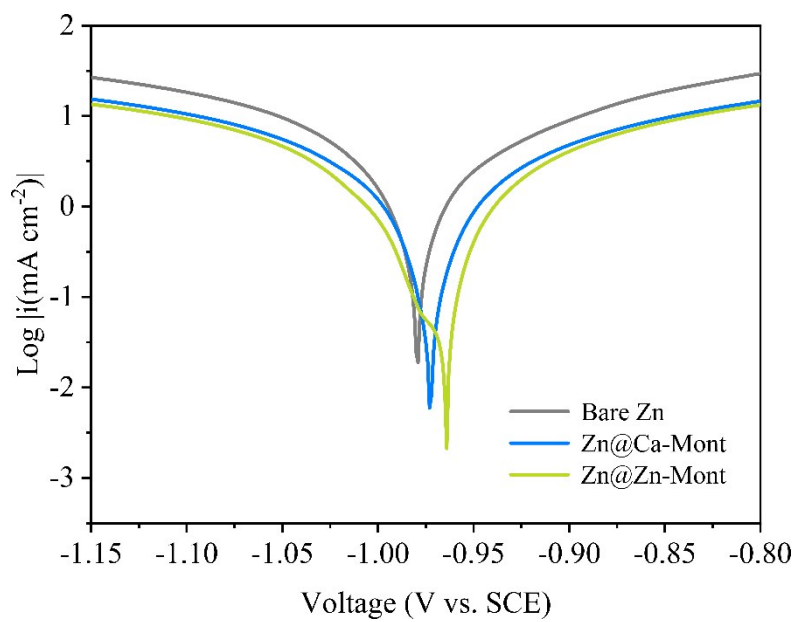

**Figure S4** Corrosion curves of the bare Zn, Zn@Ca-Mont, and Zn@Zn-Mont anodes.



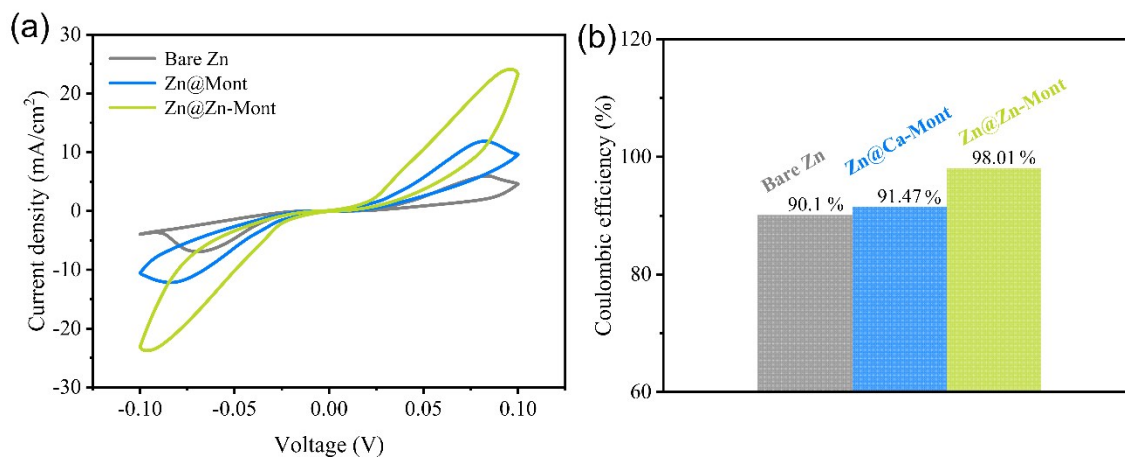

**Figure S5** (a) CV curves of Zn||Zn symmetric cells measured at 0.1 mV s<sup>-1</sup>, and (b) corresponding Coulombic efficiency.

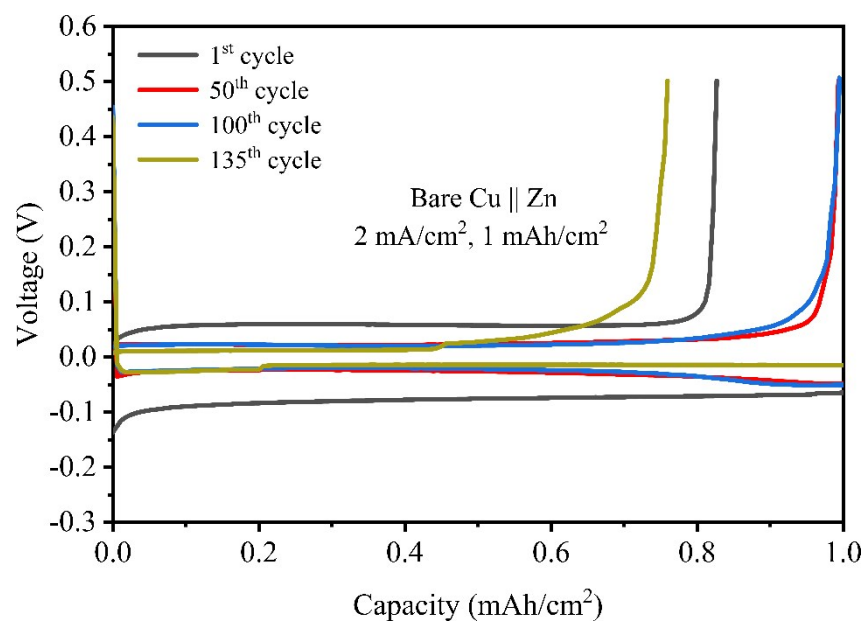

**Figure S6** Voltage profiles of the bare Cu || Zn at 2.0 mA/cm<sup>2</sup> with 1.0 mAh/cm<sup>2</sup>.

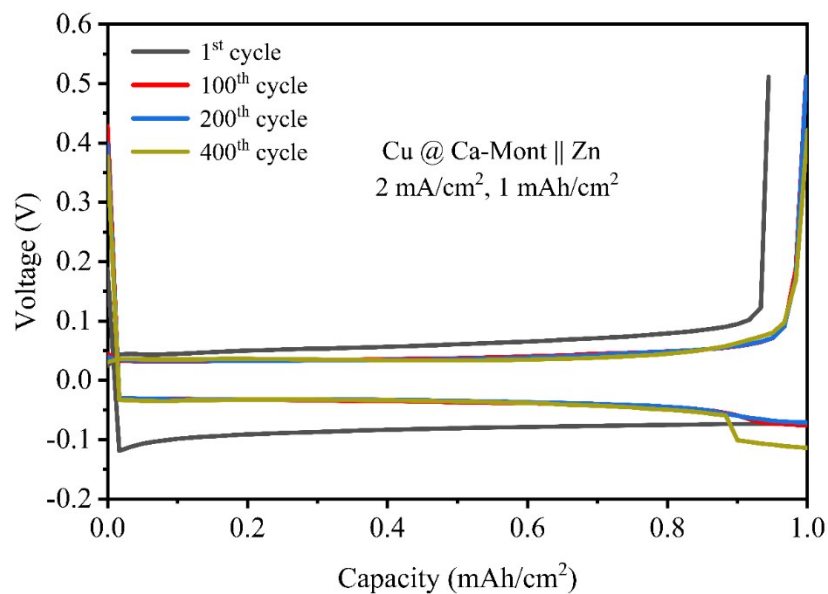

**Figure S7** Voltage profiles of the Cu@Ca-Mont || Zn at 2.0 mA/cm<sup>2</sup> with 1.0 mAh/cm<sup>2</sup>.

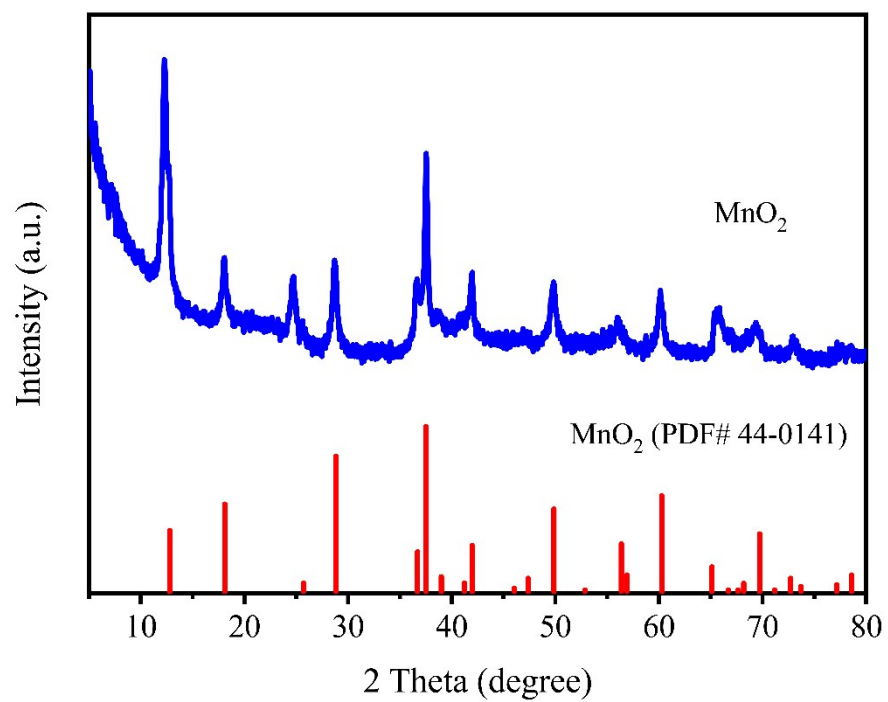

**Figure S8** XRD pattern of MnO<sub>2</sub>.

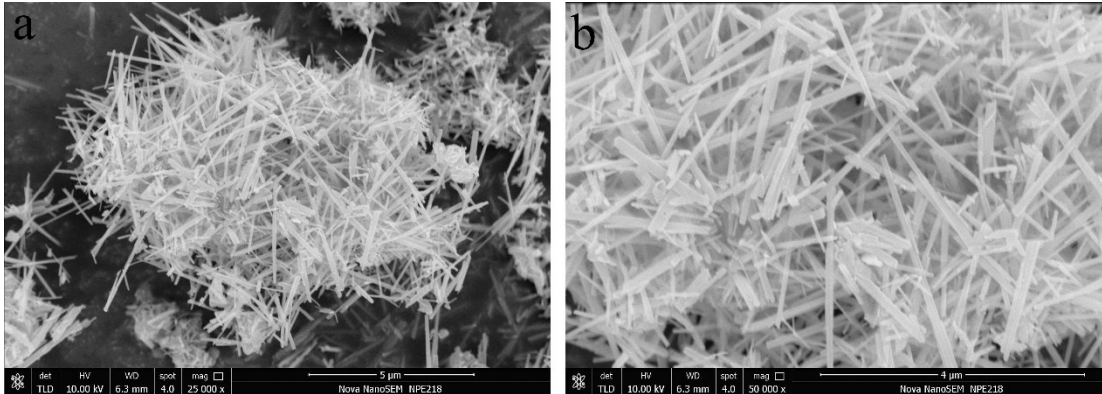

**Figure S9** FE SEM images of MnO<sub>2</sub>.

## References

- [1] A. Roy, M. Joshi and B. S. Butola, *J. Cleaner Prod.*, 2019, **212**, 1518-1525.
- [2] H. Pan, Y. Shao, P. Yan, Y. Cheng, K. S. Han, Z. Nie, C. Wang, J. Yang, X. Li, P. Bhattacharya, K. T. Mueller, J. Liu, *Nat. Energy* 2016, **1**, 16039.
- [3] Kresse G., Hafner J., *Phys. Rev. B.*, 1993, **47**, 558-561.
- [4] Kresse G., Furthmüller J., *Phys. Rev. B.*, 1996, **54**, 11169-11186.
- [5] Blöchl P. E., *Phys. Rev. B.*, 1994, **50**, 17953-17979.
- [6] Perdew J. P., Burke K., Ernzerhof, M., *Phys. Rev. Lett.*, 1996, **77**, 3865-3868.
- [7] S. Grimme, J. Antony, S. Ehrlich, and S. Krieg, *J. Chem. Phys.*, 2010, **132**, 154104.
- [8] G. Henkelman, H. Jonsson, *J. Chem. Phys.*, 2000, **113**, 9978-9985.
- [9] Q. Zhang, J. Luan, X. Huang, Q. Wang, D. Sun, Y. Tang, X. Ji and H. Wang, *Nat. Commun.*, 2020, **11**, 3961.
- [10] L. Kang, M. Cui, F. Jiang, Y. Gao, H. Luo, J. Liu, W. Liang and C. Zhi, *Adv. Energy Mater.*, 2018, **8**, 1801090.
- [11] Z. Wang, J. Huang, Z. Guo, X. Dong, Y. Liu, Y. Wang and Y. Xia, *Joule*, 2019, **3**, 1289-1300.
- [12] Y. Zeng, X. Zhang, R. Qin, X. Liu, P. Fang, D. Zheng, Y. Tong and X. Lu, *Adv.*

*Mater.*, 2019, **31**, 1903675.

[13] W. Dong, J.-L. Shi, T.-S. Wang, Y.-X. Yin, C.-R. Wang and Y.-G. Guo, *RSC Adv.*, 2018, **8**, 19157-19163.

[14] M. Liu, J. Cai, H. Ao, Z. Hou, Y. Zhu and Y. Qian, *Adv. Funct. Mater.*, 2020, **30**, 2004885.

[15] N. Zhang, S. Huang, Z. Yuan, J. Zhu, Z. Zhao and Z. Niu, *Angew. Chem., Int. Ed.*, 2021, **60**, 2861-2865.

[16] Q. Zhang, J. Luan, X. Huang, L. Zhu, Y. Tang, X. Ji and H. Wang, *Small*, 2020, **16**, 2000929.

[17] P. Liu, Z. Zhang, R. Hao, Y. Huang, W. Liu, Y. Tan, P. Li, J. Yan and K. Liu, *Chem. Eng. J.*, 2021, **403**, 126425.

[18] J. Wang, Z. Cai, R. Xiao, Y. Ou, R. Zhan, Z. Yuan and Y. Sun, *ACS Appl. Mater. Interfaces*, 2020, **12**, 23028-23034.
